# Supplementary material for: Suppressing the defects in cesium-based perovskites via polymeric interlayer assisted crystallization control
Source: Royal Society of Chemistry journal article supplement (doi:10.1039/d1ta07542j), 2021-01-01
Supplement: d1ta07542j1.pdf [file d1ta07542j1.pdf]

## Supplementary Information

### Suppressing the Defects in Cesium-Based Perovskite via Polymeric Interlayer Assisted Crystallization Control

Jia Guo<sup>a</sup>, Kaiyang Wang<sup>a</sup>, Tanghao Liu<sup>a</sup>, Qi Wei<sup>a</sup>, Shiliang Mei<sup>a</sup>, Xuanchi Yu<sup>a</sup>, Zikang Tang<sup>a</sup>, Guichuan Xing<sup>a\*</sup>, Guo Hong<sup>a\*</sup>

*<sup>a</sup> Joint Key Laboratory of the Ministry of Education, Institute of Applied Physics and Materials Engineering, University of Macau, Avenida da Universidade, Taipa, Macao 999078, China*

\*Corresponding Author: E-mail: [gcxing@um.edu.mo](mailto:gcxing@um.edu.mo) (G. Xing), [ghong@um.edu.mo](mailto:ghong@um.edu.mo) (G. Hong).

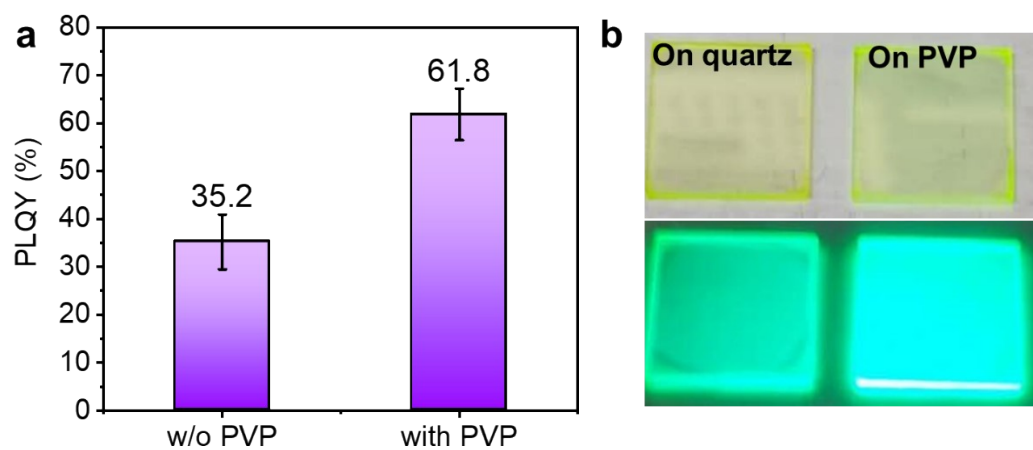

**Figure S1.** **a** PLQY of perovskite films without and with interfacial engineering. **b** photograph of perovskite films on quartz substrate and PVP substrate under daylight (top) and 365 nm UV-light (bottom).

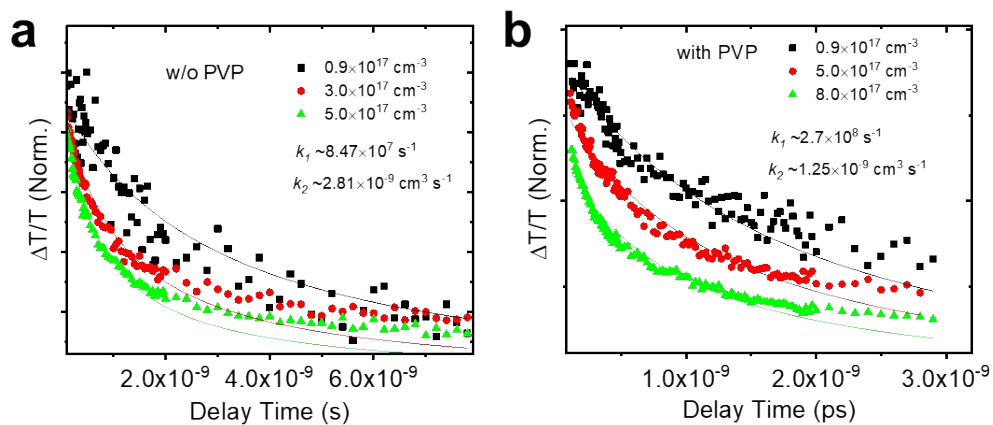

**Figure S2. a-b** TA kinetics under different pump fluence probed at the characterized bleaching peaks for the perovskite films without **a** and with **b** interfacial engineering with PVP.

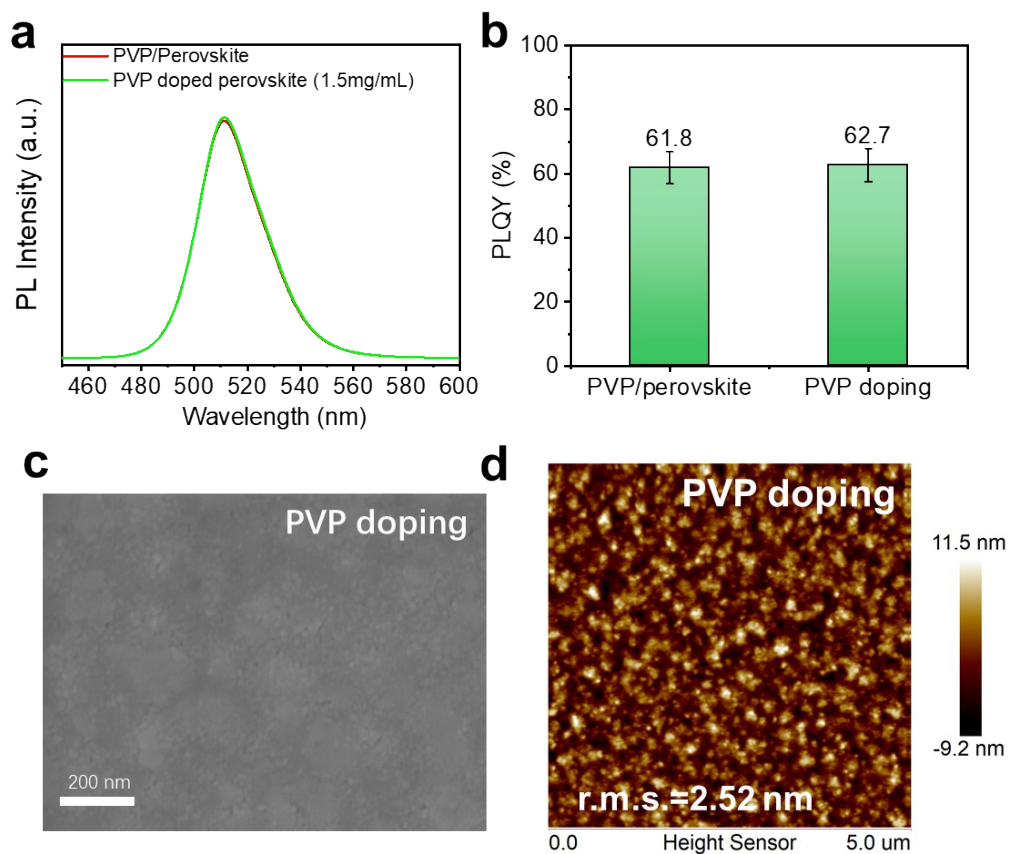

**Figure S3. Perovskite films with PVP doping.** **a** PL spectrum of perovskite films with PVP layer and with PVP doping (1.5 mg/mL). **b** PLQY statistics of two kinds of perovskite films. **c** SEM image of perovskite film with PVP doping. **d** AFM image of perovskite film with PVP doping.

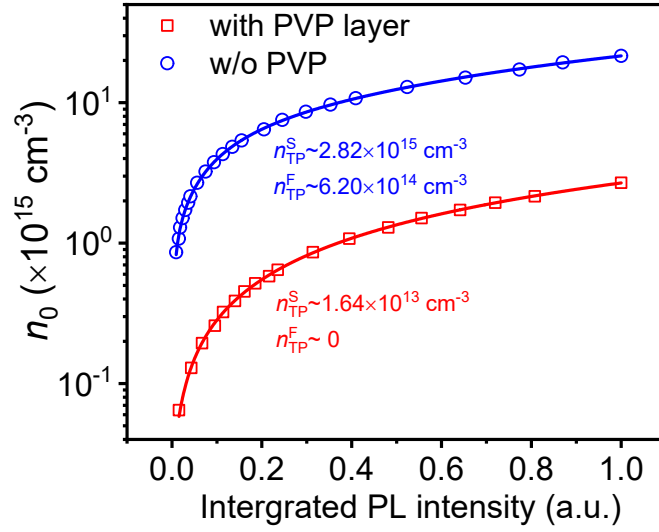

**Figure S4.** PL intensity as a function of pump fluence, measured to estimate the trap density.

Notes: The detailed trap state densities were estimated with injected carrier density dependent PL measurement. The photo-generated carrier density can be calculated as:

$$\rho_{\text{photocarrier}} = \frac{\text{light fluence density of single puulse} \times \text{light absorbance}}{\text{photo energy} \times \text{film thickness}}$$

Where the light absorbance is obtained from UV-visible absorbance spectrum. Film thickness is 80 nm, which is tested by step profiler.

The trap states density can be estimated by <sup>16</sup>:

$$n_c(0) = \sum_i n_{TP}^i(0) \left(1 - e^{-\frac{a_i \tau_0 I_{PL}}{k}}\right) + I_{PL}/k$$

Where the  $n_c(0)$  is the initial photogenerated charge carrier density,  $n_{TP}^i$  is the trap density,  $a_i$  is the product of the trapping cross section and the carrier velocity. Fitting the dependence of injected charge carrier density and PL intensity with the above equation yields two types of traps in the perovskite films, with the intrinsic traps

exhibiting fast trapping times, while the surface/interfacial traps exhibiting slow trapping times.<sup>1-3</sup> The intrinsic bulk trap density is calculated as  $n_{TP}^F \sim 6.20 \times 10^{14} \text{ cm}^{-3}$ , while the surface/interfacial trap density is  $n_{TP}^S \sim 2.82 \times 10^{15} \text{ cm}^{-3}$ . By comparison, for the PVP modified perovskite films, the bulk trap density is beyond measurement, the surface defect density is  $n_{TP}^S \sim 1.64 \times 10^{13} \text{ cm}^{-3}$ .

Table S1. Trap state density of perovskite films with and without PVP layer.

|                 | $n_{TP}^S [\text{cm}^{-3}]$    | $n_{TP}^F [\text{cm}^{-3}]$    | $n_{TP}^{total} [\text{cm}^{-3}]$ |
|-----------------|--------------------------------|--------------------------------|-----------------------------------|
| <b>w/o PVP</b>  | $2.82 \pm 0.14 \times 10^{15}$ | $6.20 \pm 1.15 \times 10^{14}$ | $3.44 \pm 0.255 \times 10^{15}$   |
| <b>With PVP</b> | $1.64 \pm 0.34 \times 10^{13}$ | $0 \pm 0$                      | $1.64 \pm 0.34 \times 10^{13}$    |

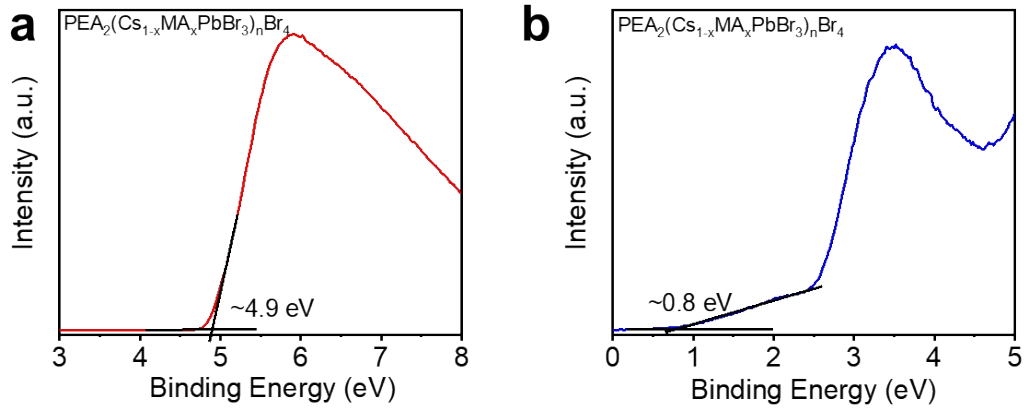

**Figure S5.** UPS measurement of perovskite films. The work function ( $W_F$ ) is 4.9 eV, valence band maximum (VBM) is 0.8 eV. The bandgap is 2.7 eV, calculated from absorption spectrum in Figure 1b.

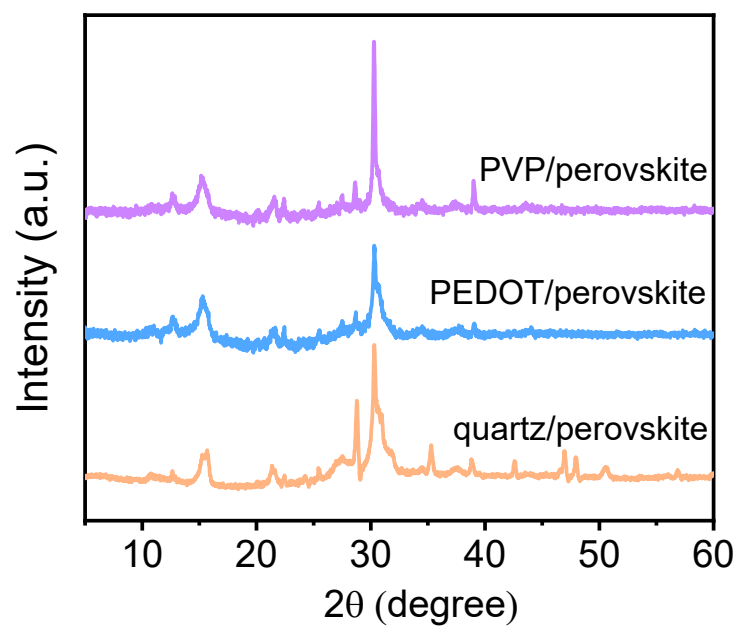

**Figure S6.** XRD pattern of perovskite film on quartz, PEDOT: PSS and PVP substrate.



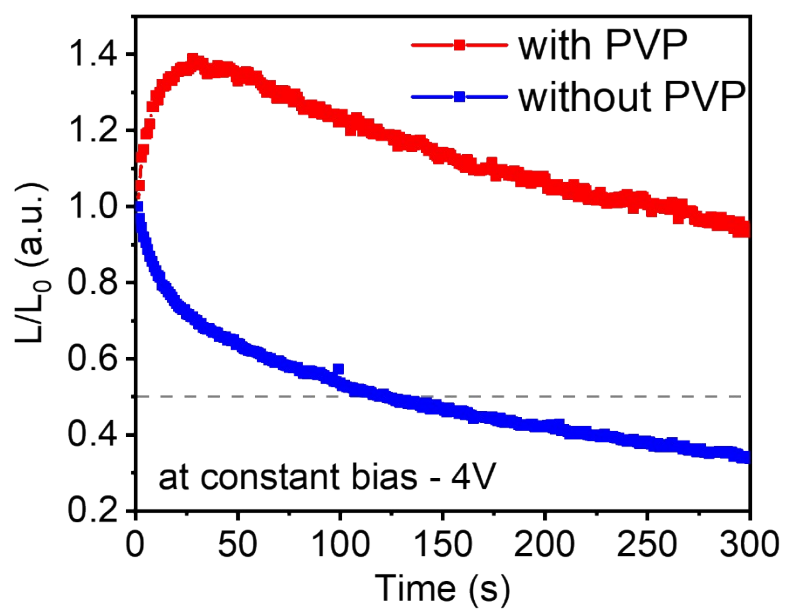

**Figure S7.** Operational stability of devices at constant bias (4V) with and without PVP interlayer.

## Reference

- [1] G. Xing, N. Mathews, S. S. Lim, N. Yantara, X. Liu, D. Sabba, M. Grätzel, S. Mhaisalkar and T. C. Sum, *Nat. Mater.* 2014, **13**, 476;
- [2] G. Xing, G. Xing, M. Li, E. J. Sie, D. Wang, A. Sulistio, Q. Ye, C. Huan, T. Wu, and T. C. Sum, *Appl. Phys. Lett.* 2011, **98**, 102105;
- [3] G. Xing, N. Mathews, S. Sun, S. S. Lim, Y. Ming, M. Grätzel, S. Mhaisalkar and T. C. Sum, *Science*, 2013, **342**, 344.
